# Supplementary material for: An untargeted metabolomics approach applied to the study of the bioavailability and metabolism of three different bioactive plant extracts in human blood samples
Source: Royal Society of Chemistry journal article supplement (doi:10.1039/d4fo01522c), 2024-01-01
Supplement: d4fo01522c2.pdf [file d4fo01522c2.pdf]

## Supplementary information

**An untargeted metabolomics approach applied to the study of the bioavailability and metabolism of bioactive compounds. A human intervention study with three different bioactive extracts.**

María del Carmen Villegas-Aguilar<sup>1,\*</sup>, María de la Luz Cádiz-Gurrea<sup>1</sup>, María Herranz-López<sup>2</sup>, Enrique Barrajón-Catalán<sup>2</sup>, David Arráez-Román<sup>1</sup>, Álvaro Fernández-Ochoa<sup>1,\*,#</sup> and Antonio Segura-Carretero<sup>1,#</sup>

<sup>1</sup>Department of Analytical Chemistry, University of Granada, 18071 Granada, Spain

<sup>2</sup>Institute of Research, Development and Innovation in Biotechnology of Elche (IDiBE) and Molecular and Cell Biology Institute (IBMC), Miguel Hernández University (UMH), 03202 Elche, Spain

Corresponding authors:

María del Carmen Villegas-Aguilar, Department of Analytical Chemistry, University of Granada, 18071 Granada, Spain, [marivillegas@ugr.es](mailto:marivillegas@ugr.es)

Álvaro Fernández-Ochoa, Department of Analytical Chemistry, University of Granada, 18071 Granada, Spain, Tel. +34 958240794, [alvaroferochoa@ugr.es](mailto:alvaroferochoa@ugr.es)

# These authors shared author co-senior ship.

**Table S1.** Identification of phytochemical compounds in *H. sabdariffa* extract by HPLC-ESI-qTOF-MS.

| RT (min) | Observed m/z [M-H] <sup>-</sup> | Theoretical m/z [M-H] <sup>-</sup> | Mass error (ppm) | Molecular Formula                               | Level of annotation | Compound name                           | MS/MS fragments | Relative area | References   |
|----------|---------------------------------|------------------------------------|------------------|-------------------------------------------------|---------------------|-----------------------------------------|-----------------|---------------|--------------|
| 0.96     | 132.0302                        | 132.0302                           | 0.00             | C <sub>4</sub> H <sub>7</sub> NO <sub>4</sub>   | 2                   | Aspartic Acid                           | 88/71           | 1.7E5         | HMDB0000191  |
| 0.99     | 294.0807                        | 294.0831                           | -8.16            | C <sub>10</sub> H <sub>17</sub> NO <sub>9</sub> | 2                   | Fructose-aspartic acid                  | 132/88          | 1.6E5         | <sup>1</sup> |
| 1.07     | 207.0150                        | 207.0146                           | 1.93             | C <sub>6</sub> H <sub>8</sub> O <sub>8</sub>    | 2                   | Hibiscus acid lactone isomer 1          | 127             | 1.3E5         | <sup>2</sup> |
| 1.15     | 207.0159                        | 207.0146                           | 6.28             | C <sub>6</sub> H <sub>8</sub> O <sub>8</sub>    | 2                   | Hibiscus acid lactone isomer 1          | 127             | 3.8E4         | <sup>2</sup> |
| 1.32     | 189.0078                        | 189.0041                           | 19.58            | C <sub>6</sub> H <sub>6</sub> O <sub>7</sub>    | 2                   | Hibiscus acid                           | 127             | 1.6E6         | <sup>3</sup> |
| 1.66     | 203.0215                        | 203.0197                           | 8.87             | C <sub>7</sub> H <sub>8</sub> O <sub>7</sub>    | 2                   | Hibiscus acid monomethyl ester isomer 1 | 142/157/201     | 1.5E5         | <sup>4</sup> |
| 1.82     | 203.0215                        | 203.0197                           | 8.87             | C <sub>7</sub> H <sub>8</sub> O <sub>7</sub>    | 2                   | Hibiscus acid monomethyl ester isomer 2 | 142/157/201     | 3.0E5         | <sup>4</sup> |
| 2.63     | 217.0332                        | 217.0354                           | -10.14           | C <sub>8</sub> H <sub>10</sub> O <sub>7</sub>   | 2                   | Hibiscus acid dimethylester             | 155/125         | 2.5E5         | <sup>5</sup> |
| 4.02     | 353.0867                        | 353.0878                           | -3.12            | C <sub>16</sub> H <sub>18</sub> O <sub>9</sub>  | 2                   | Chlorogenic acid isomer 1               | 191/135         | 7.7E4         | HMDB0003164  |
| 4.20     | 297.0266                        | 297.0252                           | 4.71             | C <sub>12</sub> H <sub>10</sub> O <sub>9</sub>  | 2                   | Methyl gallate derivative isomer 1      | 125/82          | 6.2E4         | <sup>6</sup> |
| 4.98     | 297.0266                        | 297.0252                           | 4.71             | C <sub>12</sub> H <sub>10</sub> O <sub>9</sub>  | 2                   | Methyl gallate derivative isomer 2      | 125/82          | 6.9E4         | <sup>6</sup> |
| 6.34     | 353.0867                        | 353.0878                           | -3.12            | C <sub>16</sub> H <sub>18</sub> O <sub>9</sub>  | 2                   | Chlorogenic acid isomer 2               | 191/135         | 6.3E4         | HMDB0003164  |
| 6.89     | 353.0867                        | 353.0878                           | -3.12            | C <sub>16</sub> H <sub>18</sub> O <sub>9</sub>  | 2                   | Chlorogenic acid isomer 3               | 191/135         | 8.2E4         | HMDB0003164  |
| 8.56     | 335.0771                        | 335.0772                           | -0.30            | C <sub>16</sub> H <sub>16</sub> O <sub>8</sub>  | 2                   | 5-O-Caffeoylshikimic acid               | 161/191/133     | 3.4E4         | <sup>5</sup> |

|       |          |          |        |                                                  |   |                                |             |       |                     |
|-------|----------|----------|--------|--------------------------------------------------|---|--------------------------------|-------------|-------|---------------------|
| 8.90  | 367.1030 | 367.1035 | -1.36  | C <sub>17</sub> H <sub>20</sub> O <sub>9</sub>   | 2 | 3-O-Feruloylquinic acid        | 135/179     | 1.4E4 | HMDB0030669         |
| 9.60  | 609.1458 | 609.1461 | -0.49  | C <sub>27</sub> H <sub>30</sub> O <sub>16</sub>  | 3 | Quercetin 3-O-rutinoside       | -           | 4.1E5 | HMDB0037934         |
| 9.84  | 463.0884 | 463.0882 | 0.43   | C <sub>21</sub> H <sub>20</sub> O <sub>12</sub>  | 2 | Quercetin 7-glucoside          | 301/463     | 1.0E4 | HMDB0302151         |
| 10.23 | 539.1751 | 539.1770 | -3.52  | C <sub>25</sub> H <sub>32</sub> O <sub>13</sub>  | 3 | Oleuropein                     | -           | 1.6E4 | HMDB0035872         |
| 10.96 | 317.0294 | 317.0303 | -2.84  | C <sub>15</sub> H <sub>10</sub> O <sub>8</sub>   | 2 | Myrecetin                      | 151/107     | 1.2E4 | HMDB0002755         |
| 11.07 | 312.1239 | 312.1241 | -0.64  | C <sub>18</sub> H <sub>19</sub> NO <sub>4</sub>  | 2 | N-Feruloyltyramine             | 148/190     | 1.9E4 | Pubchem:<br>6440659 |
| 12.04 | 522.3276 | 522.3283 | -1.34  | C <sub>25</sub> H <sub>49</sub> NO <sub>10</sub> | 4 | Unknown                        | -           | 1.1E4 | -                   |
| 12.15 | 301.0339 | 301.0354 | -4.98  | C <sub>15</sub> H <sub>10</sub> O <sub>7</sub>   | 1 | Quercetin                      | 151/121/65  | 4.3E4 | HMDB0005794         |
| 12.95 | 329.0654 | 329.0667 | -3.95  | C <sub>17</sub> H <sub>14</sub> O <sub>7</sub>   | 2 | 3,7-Dimethylquercetin          | 285/299/314 | 2.4E4 | HMDB0029263         |
| 13.05 | 299.0538 | 299.0561 | -7.69  | C <sub>16</sub> H <sub>12</sub> O <sub>6</sub>   | 3 | Kaempferide                    | -           | 2.4E4 | Pubchem:<br>5281666 |
| 13.13 | 394.2945 | 394.2936 | 2.28   | C <sub>20</sub> H <sub>43</sub> O <sub>7</sub>   | 4 | Unknown                        | -           | 2.9E4 | -                   |
| 13.56 | 343.0821 | 343.0823 | -0.58  | C <sub>18</sub> H <sub>16</sub> O <sub>7</sub>   | 3 | Eupatorin isomer 1             | -           | 1.4E4 | HMDB0252128         |
| 13.61 | 343.0818 | 343.0823 | -1.46  | C <sub>18</sub> H <sub>16</sub> O <sub>7</sub>   | 3 | Eupatorin isomer 2             | -           | 2.8E4 | HMDB0252128         |
| 13.69 | 313.0684 | 313.0718 | -10.86 | C <sub>17</sub> H <sub>14</sub> O <sub>6</sub>   | 3 | Cirsimaritin                   | -           | 2.6E4 | Pubchem:<br>188323  |
| 13.92 | 293.1767 | 293.1758 | 3.07   | C <sub>17</sub> H <sub>26</sub> O <sub>4</sub>   | 3 | Gingerol                       | 236/221     | 3.0E4 | HMDB0005783         |
| 15.74 | 293.2107 | 293.2122 | -5.12  | C <sub>18</sub> H <sub>30</sub> O <sub>3</sub>   | 3 | Hydroxylinolenic acid isomer 1 | -           | 3.8E4 | HMDB0011108         |
| 15.81 | 293.2119 | 293.2122 | -1.02  | C <sub>18</sub> H <sub>30</sub> O <sub>3</sub>   | 3 | Hydroxylinolenic acid isomer 2 | -           | 3.5E4 | HMDB0011108         |

|       |          |          |        |                                                 |   |                                |         |       |                      |
|-------|----------|----------|--------|-------------------------------------------------|---|--------------------------------|---------|-------|----------------------|
| 15.85 | 293.2113 | 293.2122 | -3.07  | C <sub>18</sub> H <sub>30</sub> O <sub>3</sub>  | 3 | Hydroxylinolenic acid isomer 3 | -       | 4.7E4 | HMDB0011108          |
| 16.41 | 295.2265 | 295.2279 | -4.74  | C <sub>18</sub> H <sub>32</sub> O <sub>3</sub>  | 3 | Hydroxylinoleic acid           | -       | 5.5E4 | HMDB0247599          |
| 18.46 | 277.2159 | 277.2173 | -5.05  | C <sub>18</sub> H <sub>30</sub> O <sub>2</sub>  | 2 | Linolenic acid                 | 205/97  | 1.2E5 | HMDB0001388          |
| 18.73 | 375.2712 | 375.2752 | -10.66 | C <sub>20</sub> H <sub>40</sub> O <sub>6</sub>  | 2 | Myristyl glucoside             | 291/311 | 3.8E4 | Pubchem:<br>6453025  |
| 19.15 | 279.2328 | 279.2330 | -0.72  | C <sub>18</sub> H <sub>32</sub> O <sub>2</sub>  | 3 | Linoleic acid                  | -       | 5.8E4 | HMDB0000673          |
| 19.86 | 403.3052 | 403.3065 | -3.22  | C <sub>22</sub> H <sub>44</sub> O <sub>6</sub>  | 3 | Hexadecyl D-glucoside          | -       | 9.0E4 | Pubchem:<br>171356   |
| 19.94 | 281.2508 | 281.2486 | 7.82   | C <sub>18</sub> H <sub>34</sub> O <sub>2</sub>  | 2 | Oleic Acid                     | 211/101 | 2.9E4 | HMDB0000207          |
| 20.81 | 443.2490 | 443.2439 | 11.51  | C <sub>26</sub> H <sub>36</sub> O <sub>6</sub>  | 3 | Bufotalin                      | -       | 2.1E4 | Pubchem:<br>12302120 |
| 20.97 | 383.1916 | 383.1923 | -1.83  | C <sub>16</sub> H <sub>32</sub> O <sub>10</sub> | 3 | Hexanedioic acid derivative    | -       | 5.6E4 | Pubchem:<br>88032455 |

RT: Retention Time.

**Table S2.** Identification of phytochemical compounds in *S. marianum* extract by HPLC-ESI-qTOF-MS.

| RT (min) | Observed m/z [M-H] <sup>-</sup> | Theoretical m/z [M-H] <sup>-</sup> | Mass error (ppm) | Molecular Formula                                             | Level of annotation | Compound name                       | MS/MS fragments | Relative area | References         |
|----------|---------------------------------|------------------------------------|------------------|---------------------------------------------------------------|---------------------|-------------------------------------|-----------------|---------------|--------------------|
| 0.80     | 112.9866                        | 112.9880                           | -12.39           | C <sub>4</sub> H <sub>2</sub> O <sub>4</sub>                  | 3                   | Acetylenedicarboxylic acid          | -               | 1.9E4         | HMDB0247933        |
| 0.90     | 134.0479                        | 134.0472                           | 5.22             | C <sub>5</sub> H <sub>5</sub> N <sub>5</sub>                  | 3                   | Adenine                             | -               | 1.1E4         | HMDB0000034        |
| 0.99     | 179.0556                        | 179.0561                           | -2.79            | C <sub>6</sub> H <sub>12</sub> O <sub>6</sub>                 | 3                   | Fructose                            | -               | 4.4E4         | HMDB0000660        |
| 1.06     | 266.0883                        | 266.0894                           | -4.13            | C <sub>10</sub> H <sub>13</sub> N <sub>5</sub> O <sub>4</sub> | 3                   | Adenosine                           | -               | 7.9E2         | HMDB0000050        |
| 1.09     | 117.0130                        | -                                  | -                | -                                                             | 4                   | Unknown                             | -               | 1.5E4         | -                  |
| 1.32     | 197.8088                        | -                                  | -                | -                                                             | 4                   | Unknown                             | -               | 2.5E4         | -                  |
| 6.57     | 303.0492                        | 303.0510                           | -5.94            | C <sub>15</sub> H <sub>12</sub> O <sub>7</sub>                | 2                   | Dihydroquercetin                    | 285/125         | 2.7E4         | <sup>7</sup>       |
| 6.87     | 353.0881                        | 353.0878                           | 0.85             | C <sub>16</sub> H <sub>18</sub> O <sub>9</sub>                | 2                   | Chlorogenic acid                    | 191/161         | 2.3E4         | HMDB0003164        |
| 7.75     | 373.1487                        | 373.1504                           | -4.56            | C <sub>17</sub> H <sub>26</sub> O <sub>9</sub>                | 2                   | Deoxyloganin                        | 165/135         | 6.7E4         | Pubchem: 440906    |
| 7.93     | 441.1949                        | 441.1978                           | -6.57            | C <sub>18</sub> H <sub>34</sub> O <sub>12</sub>               | 2                   | Hexo-Glucose                        | 395/249         | 4.9E4         | Pubchem: 129630443 |
| 8.05     | 505.1915                        | 505.1927                           | -2.38            | C <sub>22</sub> H <sub>34</sub> O <sub>13</sub>               | 2                   | Oleuropeic acid derivative isomer 1 | 459/293         | 3.6E4         | <sup>8</sup>       |
| 8.41     | 475.1843                        | 475.1821                           | 4.63             | C <sub>21</sub> H <sub>32</sub> O <sub>12</sub>               | 3                   | Cistanoside E                       | -               | 2.5E4         | Pubchem: 21632979  |
| 8.58     | 505.1935                        | 505.1927                           | 1.58             | C <sub>22</sub> H <sub>34</sub> O <sub>13</sub>               | 2                   | Oleuropeic acid derivative isomer 2 | 459/293         | 3.1E4         | <sup>8</sup>       |
| 8.92     | 459.1856                        | 459.1872                           | -3.48            | C <sub>21</sub> H <sub>32</sub> O <sub>11</sub>               | 2                   | Apiosylepirhododendrin              | 89/59           | 8.9E4         | Pubchem: 101287073 |
| 8.99     | 163.0389                        | 163.0401                           | -7.36            | C <sub>9</sub> H <sub>8</sub> O <sub>3</sub>                  | 2                   | 4-Hydroxycinnamic acid              | 119             | 6.3E4         | HMDB0002035        |

|       |          |          |        |                                                               |   |                                           |             |       |                        |
|-------|----------|----------|--------|---------------------------------------------------------------|---|-------------------------------------------|-------------|-------|------------------------|
| 9.12  | 193.0141 | 193.0142 | -0.52  | C <sub>9</sub> H <sub>6</sub> O <sub>5</sub>                  | 2 | Trihydroxycoumarin                        | 137/93      | 2.7E5 | 9                      |
| 9.26  | 481.1161 | 481.1140 | 4.36   | C <sub>25</sub> H <sub>22</sub> O <sub>10</sub>               | 2 | Silybin isomer 1                          | 125/178     | 2.6E5 | MoNA:VF-NPL-QTOF009680 |
| 9.42  | 455.2130 | 455.2134 | -0.88  | C <sub>19</sub> H <sub>36</sub> O <sub>12</sub>               | 3 | Alkyl glycoside                           | -           | 1.3E5 | 10                     |
| 9.58  | 303.0512 | 303.0510 | 0.66   | C <sub>15</sub> H <sub>12</sub> O <sub>7</sub>                | 2 | Dihydroquercetin                          | 285/125     | 5.1E5 | 7                      |
| 9.73  | 607.1081 | 607.1093 | -1.98  | C <sub>30</sub> H <sub>24</sub> O <sub>14</sub>               | 2 | (Epi)gallo catechin-A-(epi)gallo catechin | 285/303     | 4.5E5 | 11                     |
| 9.82  | 187.0957 | 187.0976 | -10.16 | C <sub>9</sub> H <sub>16</sub> O <sub>4</sub>                 | 3 | Azelaic acid                              | -           | 5.3E4 | HMDB0000784            |
| 9.87  | 433.1123 | 433.1140 | -3.93  | C <sub>21</sub> H <sub>22</sub> O <sub>10</sub>               | 2 | Naringenin 4'-O-glucoside                 | 271/151     | 5.1E4 | Pubchem: 42607906      |
| 10.12 | 481.1125 | 481.1140 | -3.12  | C <sub>25</sub> H <sub>22</sub> O <sub>10</sub>               | 2 | Silybin isomer 2                          | 125/178     | 7.0E4 | MoNA:VF-NPL-QTOF009680 |
| 10.25 | 483.1293 | 483.1297 | -0.83  | C <sub>25</sub> H <sub>24</sub> O <sub>10</sub>               | 2 | Silybin hydrogenated                      | 125/151/285 | 1.4E5 | 12                     |
| 10.35 | 813.3162 | 813.3187 | -3.07  | C <sub>38</sub> H <sub>54</sub> O <sub>19</sub>               | 2 | Tricrocin                                 | 767/473     | 9.1E4 | Pubchem: 22833598      |
| 10.46 | 383.1604 | 383.1612 | -2.09  | C <sub>21</sub> H <sub>24</sub> N <sub>2</sub> O <sub>5</sub> | 3 | Alschomine                                | -           | 1.3E5 | Pubchem: 11969856      |
| 10.54 | 675.3212 | 675.3174 | 5.63   | C <sub>39</sub> H <sub>48</sub> O <sub>10</sub>               | 2 | Gambogic acid A                           | 629/293     | 1.5E5 | ChemBK: 1592842-93-7   |
| 10.61 | 481.1120 | 481.1140 | -4.16  | C <sub>25</sub> H <sub>22</sub> O <sub>10</sub>               | 2 | Silybin isomer 3                          | 125/178     | 3.5E5 | MoNA:VF-NPL-QTOF009680 |
| 10.69 | 287.0516 | 287.0561 | -15.68 | C <sub>15</sub> H <sub>12</sub> O <sub>6</sub>                | 2 | Aromadendrin                              | 125/259     | 3.8E5 | HMDB0030847            |
| 10.75 | 317.0655 | 317.0667 | -3.78  | C <sub>16</sub> H <sub>14</sub> O <sub>7</sub>                | 2 | (+)-Dihydroisorhamnetin                   | 245/259     | 1.7E5 | HMDB0037501            |
| 10.96 | 481.1114 | 481.1140 | -5.40  | C <sub>25</sub> H <sub>22</sub> O <sub>10</sub>               | 2 | Silychrystin isomer 1                     | 151/125     | 1.8E5 | MoNA:RIKENPIaSMA007    |

|       |          |          |       |                                                 |   |                       |                         |       |                        |
|-------|----------|----------|-------|-------------------------------------------------|---|-----------------------|-------------------------|-------|------------------------|
|       |          |          |       |                                                 |   |                       |                         |       | 844                    |
| 11.00 | 481.1139 | 481.1140 | -0.21 | C <sub>25</sub> H <sub>22</sub> O <sub>10</sub> | 2 | Silybin isomer 3      | 125/178                 | 1.7E5 | MoNA:VF-NPL-QTOF009680 |
| 11.03 | 481.1150 | 481.1140 | 2.08  | C <sub>25</sub> H <sub>22</sub> O <sub>10</sub> | 2 | Silychrystin isomer 2 | 107/125/151/325/463     | 2.9E5 | MoNA:RIKENPIaSMA007844 |
| 11.08 | 481.1146 | 481.1140 | 1.25  | C <sub>25</sub> H <sub>22</sub> O <sub>10</sub> | 2 | Silychrystin isomer 3 | 125/151/178/325/355/433 | 2.4E5 | MoNA:MetaboBASE0687    |
| 11.54 | 677.1892 | 677.1876 | 2.36  | C <sub>35</sub> H <sub>34</sub> O <sub>14</sub> | 4 | Unknown               | -                       | 1.5E5 | -                      |
| 11.85 | 685.3060 | 685.3077 | -2.48 | C <sub>33</sub> H <sub>50</sub> O <sub>15</sub> | 2 | Pterocecide B         | 477/639                 | 6.1E4 | Pubchem: 122228272     |
| 11.90 | 659.1765 | 659.1770 | -0.76 | C <sub>35</sub> H <sub>32</sub> O <sub>13</sub> | 2 | Phylloflavanine       | 178/125                 | 1.1E5 | 13                     |
| 12.06 | 481.1130 | 481.1140 | -2.08 | C <sub>25</sub> H <sub>22</sub> O <sub>10</sub> | 2 | Silybin isomer 4      | 125/152/301             | 1.3E5 | MoNA:VF-NPL-QTOF009680 |
| 12.12 | 481.1176 | 481.1140 | 7.48  | C <sub>25</sub> H <sub>22</sub> O <sub>10</sub> | 2 | Silybin isomer 5      | 125/152/301             | 2.5E5 | MoNA:VF-NPL-QTOF009680 |
| 12.26 | 481.1172 | 481.1140 | 6.65  | C <sub>25</sub> H <sub>22</sub> O <sub>10</sub> | 2 | Silybin isomer 6      | 125/152/273             | 2.6E5 | MoNA:VF-NPL-QTOF009680 |
| 12.34 | 481.1158 | 481.1140 | 3.74  | C <sub>25</sub> H <sub>22</sub> O <sub>10</sub> | 2 | Silybin isomer 7      | 125/152/301             | 3.3E5 | MoNA:VF-NPL-QTOF009680 |
| 12.44 | 481.1120 | 481.1140 | -4.16 | C <sub>25</sub> H <sub>22</sub> O <sub>10</sub> | 2 | Silybin isomer 8      | 125/152/301             | 2.1E5 | MoNA:VF-NPL-QTOF009680 |
| 12.48 | 481.1156 | 481.1140 | 3.33  | C <sub>25</sub> H <sub>22</sub> O <sub>10</sub> | 2 | Silybin isomer 9      | 125/152/301             | 2.2E5 | MoNA:VF-NPL-QTOF009680 |
| 12.67 | 381.2269 | 381.2282 | -3.41 | C <sub>21</sub> H <sub>34</sub> O <sub>6</sub>  | 3 | Sarcostin             | -                       | 6.2E4 | Pubchem: 46173994      |

|       |          |          |       |                                                 |   |                                                               |                         |       |                   |
|-------|----------|----------|-------|-------------------------------------------------|---|---------------------------------------------------------------|-------------------------|-------|-------------------|
| 12.94 | 477.0837 | 477.0827 | 2.10  | C <sub>25</sub> H <sub>18</sub> O <sub>10</sub> | 3 | Pradinone I                                                   | -                       | 2.0E4 | Pubchem: 460846   |
| 13.01 | 477.2489 | 477.2494 | -1.05 | C <sub>26</sub> H <sub>38</sub> O <sub>8</sub>  | 3 | Adenanthin B isomer 1                                         | -                       | 3.4E4 | <sup>14</sup>     |
| 13.12 | 811.1896 | 811.1938 | -5.18 | C <sub>35</sub> H <sub>40</sub> O <sub>22</sub> | 3 | Kaempferol 3-[2''-glucosyl-6''-acetylgalactoside] 7-glucoside | -                       | 8.7E4 | FDB016214         |
| 13.42 | 989.2502 | 989.2510 | -0.81 | C <sub>52</sub> H <sub>46</sub> O <sub>20</sub> | 4 | Unknown                                                       | -                       | 2.8E5 | -                 |
| 13.70 | 523.1249 | 523.1246 | 0.57  | C <sub>27</sub> H <sub>24</sub> O <sub>11</sub> | 3 | Acetylsilybin A/B                                             | -                       | 1.0E5 | Pubchem: 10236891 |
| 13.78 | 477.2522 | 477.2493 | 6.08  | C <sub>26</sub> H <sub>38</sub> O <sub>8</sub>  | 3 | Adenanthin B isomer 2                                         | -                       | 1.2E5 | <sup>14</sup>     |
| 14.14 | 479.0975 | 479.0984 | -1.88 | C <sub>25</sub> H <sub>20</sub> O <sub>10</sub> | 2 | Dehydrosilybin                                                | 125/177/179/283/327/449 | 6.2E4 | HMDB0040513       |
| 14.87 | 627.1569 | 627.1567 | 0.32  | C <sub>27</sub> H <sub>32</sub> O <sub>17</sub> | 2 | Vitexia-glucoside                                             | 152/271/435/463         | 4.2E4 | Pubchem: 56933064 |
| 15.02 | 313.2378 | 313.2384 | -1.92 | C <sub>18</sub> H <sub>34</sub> O <sub>4</sub>  | 3 | Octadecanedioic acid                                          | -                       | 4.2E4 | Pubchem: 70095    |
| 15.61 | 564.3351 | -        | -     | -                                               | 4 | Unknown                                                       | -                       | 8.3E4 | -                 |
| 15.71 | 476.2772 | 476.2780 | -1.68 | C <sub>27</sub> H <sub>41</sub> O <sub>7</sub>  | 3 | Sinapoyloxypalmitate                                          | -                       | 3.1E4 | Pubchem: 90657145 |
| 15.83 | 564.3364 | -        | -     | -                                               | 4 | Unknown                                                       | -                       | 2.4E5 | -                 |
| 16.04 | 540.3289 | 540.3304 | -2.78 | C <sub>29</sub> H <sub>49</sub> O <sub>9</sub>  | 3 | Steroid compound                                              | -                       | 3.7E4 | <sup>15</sup>     |
| 16.30 | 540.3306 | 540.3304 | 0.37  | C <sub>29</sub> H <sub>49</sub> O <sub>9</sub>  | 3 | Steroid compound                                              | -                       | 1.6E5 | <sup>15</sup>     |
| 16.37 | 566.3453 | -        | -     | -                                               | 4 | Unknown                                                       | -                       | 6.0E4 | -                 |
| 16.60 | 566.3530 | -        | -     | -                                               | 4 | Unknown                                                       | -                       | 2.1E5 | -                 |
| 18.66 | 591.4117 | 591.4114 | 0.51  | C <sub>31</sub> H <sub>60</sub> O <sub>10</sub> | 4 | Unknown                                                       | -                       | 6.6E4 | -                 |



|       |          |          |        |                                                |   |                         |         |       |                   |
|-------|----------|----------|--------|------------------------------------------------|---|-------------------------|---------|-------|-------------------|
| 18.73 | 375.2712 | 375.2752 | -10.66 | C <sub>20</sub> H <sub>40</sub> O <sub>6</sub> | 2 | Myristyl glucoside      | 291/311 | 2.9E4 | Pubchem: 6453025  |
| 19.16 | 279.2328 | 279.2330 | -0.72  | C <sub>18</sub> H <sub>32</sub> O <sub>2</sub> | 3 | Linoleic acid           | -       | 5.6E4 | HMDB0000673       |
| 19.74 | 577.3730 | 577.3746 | -2.77  | C <sub>33</sub> H <sub>54</sub> O <sub>8</sub> | 3 | Timosaponin A           | -       | 4.1E4 | <sup>16</sup>     |
| 19.85 | 403.3052 | 403.3065 | -3.22  | C <sub>22</sub> H <sub>44</sub> O <sub>6</sub> | 3 | Hexadecyl D-glucoside   | -       | 8.5E4 | Pubchem: 171356   |
| 19.94 | 281.2508 | 281.2486 | 7.82   | C <sub>18</sub> H <sub>34</sub> O <sub>2</sub> | 2 | Oleic Acid              | 211/101 | 6.4E4 | HMDB0000207       |
| 20.62 | 605.4040 | 605.4059 | -3.14  | C <sub>35</sub> H <sub>58</sub> O <sub>8</sub> | 3 | Deoxybafilomycin A1     | -       | 3.5E4 | CAS: 1883587-79-8 |
| 20.98 | 621.4417 | 621.4372 | 7.24   | C <sub>36</sub> H <sub>62</sub> O <sub>8</sub> | 3 | Ginsenoside Rh2         | -       | 2.1E5 | Pubchem:119307    |
| 21.56 | 633.4375 | 633.4371 | 0.63   | C <sub>37</sub> H <sub>62</sub> O <sub>8</sub> | 3 | Karaviloside III        | -       | 5.4E4 | CHEMBL2335924     |
| 22.92 | 371.2592 | 371.2592 | 0.00   | C <sub>24</sub> H <sub>36</sub> O <sub>3</sub> | 3 | Pelandjauic acid        | -       | 1.6E5 | Pubchem: 178575   |
| 24.49 | 373.2751 | 373.2748 | 0.80   | C <sub>24</sub> H <sub>38</sub> O <sub>3</sub> | 3 | Dehydrolithocholic acid | -       | 1.4E5 | Pubchem: 4446994  |

RT: Retention Time.

**Table S3.** Identification of phytochemical compounds in *T. cacao* extract by HPLC-ESI-qTOF-MS.

| RT (min) | Observed m/z [M-H] <sup>-</sup> | Theoretical m/z [M-H] <sup>-</sup> | Mass error (ppm) | Molecular Formula                                            | Level of annotation | Compound name                                    | MS/MS fragments | Relative area | Phenolic content (mg/g dry extract) | References        |
|----------|---------------------------------|------------------------------------|------------------|--------------------------------------------------------------|---------------------|--------------------------------------------------|-----------------|---------------|-------------------------------------|-------------------|
| 0.75     | 272.9512                        | -                                  | -                | -                                                            | 4                   | Unknown                                          | -               | 5.5E4         |                                     | -                 |
| 0.91     | 203.1035                        | 203.1037                           | -0.98            | C <sub>8</sub> H <sub>16</sub> N <sub>2</sub> O <sub>4</sub> | 2                   | Valylserine                                      | 74/141/173      | 5.9E4         |                                     | Pubchem: 18218236 |
| 0.92     | 217.1187                        | 217.1194                           | -3.22            | C <sub>9</sub> H <sub>18</sub> N <sub>2</sub> O <sub>4</sub> | 2                   | Leucylserine                                     | 74/129/173      | 7.7E4         |                                     | Pubchem: 3621685  |
| 1.01     | 195.0519                        | 195.0510                           | 4.61             | C <sub>6</sub> H <sub>12</sub> O <sub>7</sub>                | 2                   | Gluconic acid                                    | 75/129/177      | 4.3E5         |                                     | HMDB0000625       |
| 1.13     | 191.0207                        | 191.0197                           | 5.24             | C <sub>6</sub> H <sub>8</sub> O <sub>7</sub>                 | 2                   | Citric acid isomer 1                             | 87/111          | 3.9E4         |                                     | HMDB0000094       |
| 1.33     | 191.0228                        | 191.0197                           | 16.23            | C <sub>6</sub> H <sub>8</sub> O <sub>7</sub>                 | 2                   | Citric acid isomer 2                             | 87/111          | 1.8E5         |                                     | HMDB0000094       |
| 1.69     | 96.9605                         | 96.9601                            | 4.13             | H <sub>2</sub> O <sub>4</sub> S                              | 3                   | Sulfate                                          | -               | 7.1E5         |                                     | HMDB0001448       |
| 2.67     | 117.0554                        | 117.0557                           | -2.56            | C <sub>5</sub> H <sub>10</sub> O <sub>3</sub>                | 2                   | 3-Hydroxyvaleric acid                            | 71/99           | 6.4E4         |                                     | HMDB0000531       |
| 4.66     | 294.0606                        | 294.0619                           | -4.42            | C <sub>13</sub> H <sub>13</sub> NO <sub>7</sub>              | 2                   | N-caffeoyl-L-aspartate isomer 1                  | 88/132/179      | 9.7E4         |                                     | 17                |
| 5.05     | 294.0610                        | 294.0619                           | -3.06            | C <sub>13</sub> H <sub>13</sub> NO <sub>7</sub>              | 2                   | N-caffeoyl-L-aspartate isomer 2                  | 88/132/179      | 1.2E5         |                                     | 17                |
| 5.40     | 131.0704                        | 131.0714                           | -7.63            | C <sub>6</sub> H <sub>12</sub> O <sub>3</sub>                | 2                   | L-Leucate                                        | 85              | 2.4E5         |                                     | Pubchem: 69955    |
| 5.61     | 407.1554                        | 407.1559                           | -1.23            | C <sub>17</sub> H <sub>28</sub> O <sub>11</sub>              | 3                   | Secoiridoid derived                              | 99/263/305      | 3.1E4         |                                     | 18                |
| 6.01     | 289.0721                        | 289.0718                           | 1.04             | C <sub>15</sub> H <sub>14</sub> O <sub>6</sub>               | 1                   | Catechin                                         | 161/163/174/192 | 2.0E4         | 0.18                                | HMDB0001871       |
| 6.88     | 278.0670                        | 278.0670                           | 0.00             | C <sub>13</sub> H <sub>13</sub> NO <sub>6</sub>              | 2                   | L-Aspartic acid, N-[3-(4-hydroxyphenyl)-1-oxo-2- | 71/93/119       | 1.3E5         |                                     | 17                |

|       |          |          |       |                                                  |   | propenyl]                                                                        |                             |       |      |                      |
|-------|----------|----------|-------|--------------------------------------------------|---|----------------------------------------------------------------------------------|-----------------------------|-------|------|----------------------|
| 7.01  | 165.0554 | 165.0557 | -1.82 | C <sub>9</sub> H <sub>10</sub> O <sub>3</sub>    | 2 | Dihydro-p-coumaric acid                                                          | 72/103/147                  | 2.2E5 |      | HMDB0002199          |
| 7.60  | 289.0716 | 289.0718 | -0.69 | C <sub>15</sub> H <sub>14</sub> O <sub>6</sub>   | 2 | Epicatechin                                                                      | 161/163/174/192             | 1.4E5 | 1.95 | HMDB0002780          |
| 7.80  | 275.1006 | -        | -     | -                                                | 4 | Unknown                                                                          | -                           | 8.7E4 |      | -                    |
| 8.01  | 577.1352 | 577.1352 | 0.00  | C <sub>30</sub> H <sub>26</sub> O <sub>12</sub>  | 2 | Procyanidin B1                                                                   | -                           | 4.6E4 | 0.79 | <sup>17</sup>        |
| 8.37  | 437.2040 | 437.2028 | 2.74  | C <sub>19</sub> H <sub>34</sub> O <sub>11</sub>  | 2 | Ebracteatoside D isomer 1                                                        | 57/99/161                   | 6.5E4 |      | -                    |
| 8.61  | 167.0366 | 167.0350 | 9.58  | C <sub>8</sub> H <sub>8</sub> O <sub>4</sub>     | 3 | Vanillic acid                                                                    | -                           | 1.0E5 |      | HMDB0000484          |
| 8.79  | 865.1988 | 865.1985 | 0.35  | C <sub>45</sub> H <sub>38</sub> O <sub>18</sub>  | 2 | Procyanidin C                                                                    | 289/577                     | 2.6E4 | 0.47 | <sup>17</sup>        |
| 9.18  | 305.0690 | 305.0700 | -3.28 | C <sub>12</sub> H <sub>18</sub> O <sub>7</sub> S | 2 | Hydroxy-jasmonic acid sulfate                                                    | 225/67/59                   | 7.6E5 |      | <sup>19</sup>        |
| 9.51  | 437.2057 | 437.2028 | 6.63  | C <sub>19</sub> H <sub>34</sub> O <sub>11</sub>  | 2 | Ebracteatoside D isomer 2                                                        | 57/99/161                   | 2.2E4 |      | -                    |
| 9.70  | 737.1750 | 737.1723 | 3.66  | C <sub>36</sub> H <sub>34</sub> O <sub>17</sub>  | 2 | (Epi)catechin dimer hexose                                                       | 449/611/539/289             | 1.9E4 |      | <sup>17</sup>        |
| 9.85  | 463.0878 | 463.0882 | -0.86 | C <sub>21</sub> H <sub>20</sub> O <sub>12</sub>  | 1 | Quercetin glucoside                                                              | 149/242/271/285<br>/300/335 | 3.3E4 |      | HMDB0037362          |
| 9.93  | 707.1787 | 707.1828 | -5.80 | C <sub>32</sub> H <sub>36</sub> O <sub>18</sub>  | 2 | Kalambroside A                                                                   | 449/539/581/289             | 1.9E4 |      | Pubchem:<br>10349838 |
| 9.99  | 516.2476 | 516.2450 | 5.04  | C <sub>24</sub> H <sub>39</sub> NO <sub>11</sub> | 4 | Unknown                                                                          | -                           | 2.8E4 |      | <sup>17</sup>        |
| 10.18 | 326.1075 | 326.1034 | 12.57 | C <sub>18</sub> H <sub>17</sub> NO <sub>5</sub>  | 2 | Deoxyclovamide (N-[(2E)-3-(3,4-Dihydroxyphenyl)-1-oxo-2-propen-1-yl]-L-tyrosine) | 206/282/119                 | 1.7E4 |      | <sup>17</sup>        |
| 10.24 | 433.0806 | 433.0776 | 6.93  | C <sub>20</sub> H <sub>18</sub> O <sub>11</sub>  | 2 | Quercetin arabinoside                                                            | 300/271                     | 3.5E4 |      | <sup>17</sup>        |
| 10.45 | 238.1091 | 238.1085 | 2.52  | C <sub>12</sub> H <sub>17</sub> NO <sub>4</sub>  | 3 | Dihydroisoflavipucine                                                            | -                           | 1.3E4 |      | Pubchem:             |

|       |          |          |       |                                                               |   |                                                               |            |       |  |                      |
|-------|----------|----------|-------|---------------------------------------------------------------|---|---------------------------------------------------------------|------------|-------|--|----------------------|
|       |          |          |       |                                                               |   |                                                               |            |       |  | 38354263             |
| 10.75 | 272.0935 | 272.0928 | 2.57  | C <sub>15</sub> H <sub>15</sub> NO <sub>4</sub>               | 2 | L-Thyronine                                                   | 94/124     | 1.4E4 |  | HMDB0000667          |
| 11.09 | 421.2064 | 421.2079 | -3.56 | C <sub>19</sub> H <sub>34</sub> O <sub>10</sub>               | 2 | 1-Octen-3-yl primeveroside                                    | 57/97/277  | 1.3E5 |  | HMDB0032960          |
| 12.16 | 301.0339 | 301.0354 | -4.98 | C <sub>15</sub> H <sub>10</sub> O <sub>7</sub>                | 1 | Quercetin                                                     | 151/121/65 | 1.3E4 |  | HMDB0005794          |
| 12.36 | 391.1196 | 391.1187 | 2.30  | C <sub>23</sub> H <sub>20</sub> O <sub>6</sub>                | 2 | Dehydrodeguelin                                               | 117/62     | 1.6E4 |  | <sup>20</sup>        |
| 12.46 | 329.2329 | 329.2333 | -1.21 | C <sub>18</sub> H <sub>34</sub> O <sub>5</sub>                | 2 | 5,8,12-Trihydroxy-9-octadecenoic acid isomer 1                | 211        | 4.1E4 |  | HMDB0030936          |
| 12.57 | 329.2358 | 329.2333 | 7.59  | C <sub>18</sub> H <sub>34</sub> O <sub>5</sub>                | 2 | 5,8,12-Trihydroxy-9-octadecenoic acid isomer 2                | 211        | 1.0E4 |  | HMDB0030936          |
| 12.79 | 357.1215 | 357.1191 | 6.72  | C <sub>16</sub> H <sub>22</sub> O <sub>9</sub>                | 2 | Sweroside                                                     | 97/198     | 1.5E5 |  | <sup>17</sup>        |
| 13.13 | 394.2954 | 394.2963 | -2.28 | C <sub>23</sub> H <sub>41</sub> NO <sub>4</sub>               | 4 | Unknown                                                       | -          | 2.5E4 |  | -                    |
| 13.47 | 276.1227 | 276.1241 | -5.07 | C <sub>15</sub> H <sub>19</sub> NO <sub>4</sub>               | 3 | Barmumycin                                                    | -          | 4.1E4 |  | <sup>21</sup>        |
| 13.92 | 293.1748 | 293.1758 | -3.41 | C <sub>17</sub> H <sub>26</sub> O <sub>4</sub>                | 2 | Gingerol                                                      | 236/221    | 2.9E4 |  | HMDB0005783          |
| 14.07 | 333.1815 | 333.1820 | -1.50 | C <sub>18</sub> H <sub>26</sub> N <sub>2</sub> O <sub>4</sub> | 3 | Hydroxyhuperzine                                              | -          | 1.9E4 |  | <sup>22</sup>        |
| 14.20 | 367.1671 | 367.1663 | 2.18  | C <sub>21</sub> H <sub>24</sub> N <sub>2</sub> O <sub>4</sub> | 3 | 3,4-dimethoxy-N-[4-[oxo(1-piperidinyl)methyl]phenyl]benzamide | -          | 2.3E4 |  | CHEBI:114263         |
| 14.77 | 195.0686 | 195.0663 | 11.79 | C <sub>10</sub> H <sub>12</sub> O <sub>4</sub>                | 2 | Ethyl vanillate                                               | 123        | 6.9E4 |  | <sup>23</sup>        |
| 15.61 | 564.3295 | -        | -     | -                                                             | 4 | Unknown                                                       | -          | 3.1E4 |  | -                    |
| 15.71 | 476.2780 | 476.2780 | 0.00  | C <sub>27</sub> H <sub>41</sub> O <sub>7</sub>                | 2 | Sinapoyloxypalmitate                                          | 279        | 5.1E4 |  | Pubchem:<br>90657145 |

|       |          |          |        |                                                 |   |                             |         |       |                      |
|-------|----------|----------|--------|-------------------------------------------------|---|-----------------------------|---------|-------|----------------------|
| 15.83 | 564.3292 | -        | -      | -                                               | 4 | Unknown                     | -       | 1.8E5 | -                    |
| 16.30 | 540.3288 | -        | -      | -                                               | 4 | Unknown                     | -       | 1.1E5 | -                    |
| 16.60 | 566.3492 | -        | -      | -                                               | 4 | Unknown                     | -       | 2.3E5 | -                    |
| 17.58 | 299.2585 | 299.2592 | -2.34  | C <sub>18</sub> H <sub>36</sub> O <sub>3</sub>  | 3 | Hydroxyoctadecanoic acid    | -       | 7.3E4 | HMDB0112182          |
| 17.81 | 297.2424 | 297.2435 | -3.70  | C <sub>18</sub> H <sub>34</sub> O <sub>3</sub>  | 2 | Oxoctadecanoic acid         | 253/155 | 6.1E4 | HMDB0030981          |
| 18.46 | 277.2159 | 277.2173 | -5.05  | C <sub>18</sub> H <sub>30</sub> O <sub>2</sub>  | 2 | Linolenic acid              | 205/97  | 6.7E4 | HMDB0001388          |
| 18.73 | 375.2712 | 375.2752 | -10.66 | C <sub>20</sub> H <sub>40</sub> O <sub>6</sub>  | 2 | Myristyl glucoside          | 291/311 | 4.5E4 | Pubchem:<br>6453025  |
| 19.16 | 279.2328 | 279.2330 | -0.72  | C <sub>18</sub> H <sub>32</sub> O <sub>2</sub>  | 3 | Linoleic acid               | -       | 1.4E5 | HMDB0000673          |
| 19.82 | 255.2325 | 255.2330 | -1.96  | C <sub>16</sub> H <sub>32</sub> O <sub>2</sub>  | 2 | Palmitic acid               | 190/110 | 1.6E5 | HMDB0000220          |
| 19.87 | 403.3052 | 403.3065 | -3.22  | C <sub>22</sub> H <sub>44</sub> O <sub>6</sub>  | 3 | Hexadecyl D-glucoside       | -       | 9.9E4 | Pubchem:<br>171356   |
| 19.95 | 281.2482 | 281.2486 | -1.42  | C <sub>18</sub> H <sub>34</sub> O <sub>2</sub>  | 2 | Oleic Acid                  | 211/101 | 1.6E5 | HMDB0000207          |
| 20.98 | 383.1934 | 383.1923 | 2.87   | C <sub>16</sub> H <sub>32</sub> O <sub>10</sub> | 3 | Hexanedioic acid derivative | -       | 1.2E5 | Pubchem:<br>88032455 |

RT: Retention Time.

**Table S4.** Unknown compounds detected in plasma samples obtained after intake of an extract of *H. sabdariffa*, *S. marianum* and *T. cacao*.

| RT (min) | <i>H. sabdariffa</i> * | <i>S. marianum</i> * | <i>T. cacao</i> * | Observed m/z | Adduct             | Theoretical m/z | Mass error (ppm) | Molecular formula                            | MS/MS fragments |
|----------|------------------------|----------------------|-------------------|--------------|--------------------|-----------------|------------------|----------------------------------------------|-----------------|
| 1.2      | 8                      | 0                    | 0                 | 83.0139      | (M-H) <sup>-</sup> | 83.0139         | 1.14             | C <sub>4</sub> H <sub>4</sub> O <sub>2</sub> | -               |

|      |   |   |   |          |                    |          |        |                                                                |                                 |
|------|---|---|---|----------|--------------------|----------|--------|----------------------------------------------------------------|---------------------------------|
| 1.2  | 6 | 0 | 0 | 503.0761 | (M-H) <sup>-</sup> | 503.0772 | -2.23  | C <sub>30</sub> H <sub>16</sub> O <sub>8</sub>                 | 313.0631; 189.0036              |
| 1.4  | 6 | 0 | 0 | 203.9975 | (M-H) <sup>-</sup> | 203.9945 | 14.46  | C <sub>3</sub> H <sub>9</sub> O <sub>8</sub> S                 | -                               |
| 2.0  | 6 | 0 | 0 | 141.0192 | (M-H) <sup>-</sup> | 141.0193 | -0.65  | C <sub>6</sub> H <sub>6</sub> O <sub>4</sub>                   | -                               |
| 4.1  | 0 | 0 | 7 | 181.0366 | (M-H) <sup>-</sup> | 181.0354 | 6.63   | C <sub>5</sub> H <sub>10</sub> O <sub>7</sub>                  | 134.0356; 107.0499;<br>164.0357 |
| 5.5  | 8 | 0 | 0 | 141.0192 | (M-H) <sup>-</sup> | 141.0193 | -1.05  | C <sub>6</sub> H <sub>6</sub> O <sub>4</sub>                   | -                               |
| 10.4 | 0 | 0 | 8 | 167.0378 | (M-H) <sup>-</sup> | 167.0384 | -3.39  | C <sub>5</sub> H <sub>12</sub> O <sub>4</sub> S                | 96.9588                         |
| 11.8 | 0 | 5 | 0 | 368.0475 | (M-H) <sup>-</sup> | 368.0538 | -16.93 | C <sub>19</sub> H <sub>13</sub> O <sub>8</sub>                 | 175.0267                        |
| 12.2 | 0 | 5 | 0 | 833.1774 | (M-H) <sup>-</sup> | -        | -      | -                                                              | -                               |
| 12.8 | 0 | 5 | 0 | 833.1775 | (M-H) <sup>-</sup> | -        | -      | -                                                              | -                               |
| 13.0 | 0 | 5 | 0 | 245.0487 | (M-H) <sup>-</sup> | 245.0489 | -1.03  | C <sub>10</sub> H <sub>14</sub> O <sub>5</sub> S               | -                               |
| 13.0 | 0 | 4 | 0 | 368.5492 | (M-H) <sup>-</sup> | -        | -      | -                                                              | 280.0324; 113.0260              |
| 13.1 | 0 | 8 | 0 | 368.0477 | (M-H) <sup>-</sup> | 368.0538 | -16.53 | C <sub>19</sub> H <sub>13</sub> O <sub>8</sub>                 | 175.0267                        |
| 13.2 | 0 | 4 | 0 | 404.9896 | (M-H) <sup>-</sup> | 404.9922 | -6.36  | C <sub>17</sub> H <sub>10</sub> O <sub>10</sub> S              | -                               |
| 13.4 | 0 | 6 | 0 | 368.5492 | (M-H) <sup>-</sup> | -        | -      | -                                                              | 280.0324; 113.0261              |
| 13.4 | 0 | 4 | 0 | 535.1814 | (M-H) <sup>-</sup> | 535.1821 | -1.28  | C <sub>26</sub> H <sub>32</sub> O <sub>12</sub>                | 175.0222; 113.0299              |
| 13.5 | 0 | 8 | 0 | 368.0477 | (M-H) <sup>-</sup> | 368.0538 | -16.57 | C <sub>19</sub> H <sub>13</sub> O <sub>8</sub>                 | 175.0267                        |
| 13.5 | 0 | 5 | 0 | 759.0845 | (M-H) <sup>-</sup> | -        | -      | -                                                              | -                               |
| 13.5 | 0 | 5 | 0 | 402.0405 | (M-H) <sup>-</sup> | -        | -      | -                                                              | -                               |
| 13.5 | 0 | 6 | 0 | 549.1608 | (M-H) <sup>-</sup> | 549.1614 | -0.97  | C <sub>26</sub> H <sub>30</sub> O <sub>13</sub>                | 459.3905; 174.0624              |
| 14.5 | 0 | 5 | 0 | 549.1016 | (M-H) <sup>-</sup> | -        | -      | -                                                              | 371.1065;                       |
| 14.7 | 0 | 5 | 0 | 747.1153 | (M-H) <sup>-</sup> | 747.1143 | 1.39   | C <sub>19</sub> H <sub>40</sub> O <sub>26</sub> S <sub>2</sub> | -                               |
| 15.6 | 0 | 6 | 0 | 549.1015 | (M-H) <sup>-</sup> | -        | -      | -                                                              | 371.1065                        |
| 15.6 | 0 | 5 | 0 | 503.0954 | (M-H) <sup>-</sup> | 503.0984 | -5.89  | C <sub>27</sub> H <sub>20</sub> O <sub>10</sub>                | -                               |
| 15.6 | 0 | 4 | 0 | 511.2542 | (M-H) <sup>-</sup> | -        | -      | -                                                              | 175.0208; 113.0194              |
| 15.7 | 0 | 6 | 0 | 549.1013 | (M-H) <sup>-</sup> | -        | -      | -                                                              | 371.1065                        |

|      |   |   |   |          |                    |          |       |                                                  |                                 |
|------|---|---|---|----------|--------------------|----------|-------|--------------------------------------------------|---------------------------------|
| 15.9 | 0 | 7 | 0 | 511.2543 | (M-H) <sup>-</sup> | 511.2549 | -1.08 | C <sub>26</sub> H <sub>40</sub> O <sub>10</sub>  | 175.0208; 113.0194              |
| 16.0 | 0 | 5 | 0 | 549.1013 | (M-H) <sup>-</sup> | -        | -     | -                                                | 371.1065                        |
| 17.1 | 4 | 0 | 0 | 227.1285 | (M-H) <sup>-</sup> | 227.1289 | -1.78 | C <sub>12</sub> H <sub>20</sub> O <sub>4</sub>   | 157.1219;182.0693               |
| 17.5 | 0 | 0 | 5 | 326.1222 | (M-H) <sup>-</sup> | -        | -     | -                                                | -                               |
| 17.5 | 0 | 0 | 4 | 416.0911 | (M-H) <sup>-</sup> | -        | -     | -                                                | 240.1475; 295.2614;<br>159.0587 |
| 17.5 | 0 | 0 | 5 | 348.1038 | (M-H) <sup>-</sup> | 348.1037 | 0.38  | C <sub>18</sub> H <sub>21</sub> O <sub>5</sub> S | -                               |
| 17.6 | 0 | 0 | 4 | 511.3020 | (M-H) <sup>-</sup> | -        | -     | -                                                | -                               |
| 17.6 | 0 | 0 | 4 | 788.2430 | (M-H) <sup>-</sup> | -        | -     | -                                                | -                               |
| 18.5 | 0 | 0 | 4 | 314.2404 | (M-H) <sup>-</sup> | -        | -     | -                                                | -                               |
| 18.6 | 0 | 0 | 5 | 435.2759 | (M-H) <sup>-</sup> | -        | -     | -                                                | -                               |
| 19.3 | 0 | 0 | 5 | 495.2574 | (M-H) <sup>-</sup> | -        | -     | -                                                | 287.9892; 147.0447              |
| 20.5 | 0 | 0 | 4 | 634.2370 | (M-H) <sup>-</sup> | -        | -     | -                                                | -                               |
| 29.0 | 5 | 0 | 0 | 489.3554 | (M-H) <sup>-</sup> | 489.3585 | -6.36 | C <sub>30</sub> H <sub>50</sub> O <sub>5</sub>   | -                               |
| 29.3 | 5 | 0 | 0 | 690.3819 | (M-H) <sup>-</sup> | -        | -     | -                                                | -                               |
| 29.4 | 4 | 0 | 0 | 675.4551 | (M-H) <sup>-</sup> | -        | -     | -                                                | -                               |
| 29.5 | 5 | 0 | 0 | 930.6609 | (M-H) <sup>-</sup> | -        | -     | -                                                | -                               |
| 32.7 | 5 | 0 | 0 | 774.5459 | (M-H) <sup>-</sup> | -        | -     | -                                                | -                               |

\*Number of volunteers in whom the metabolite appears; RT: retention time.

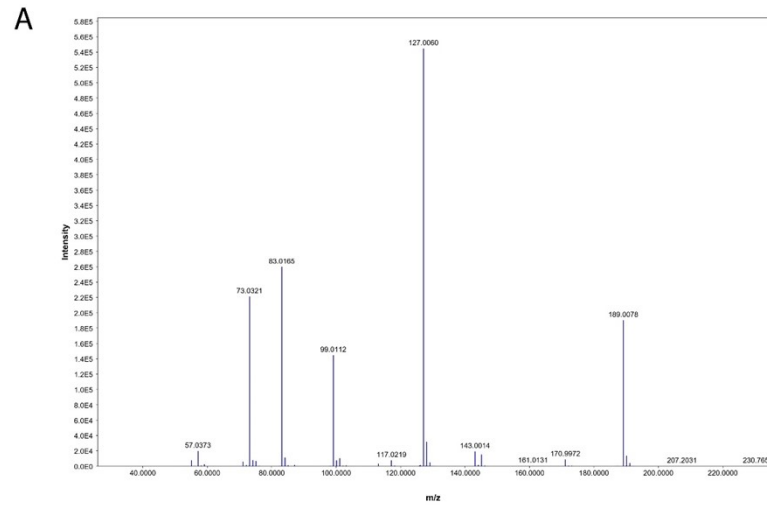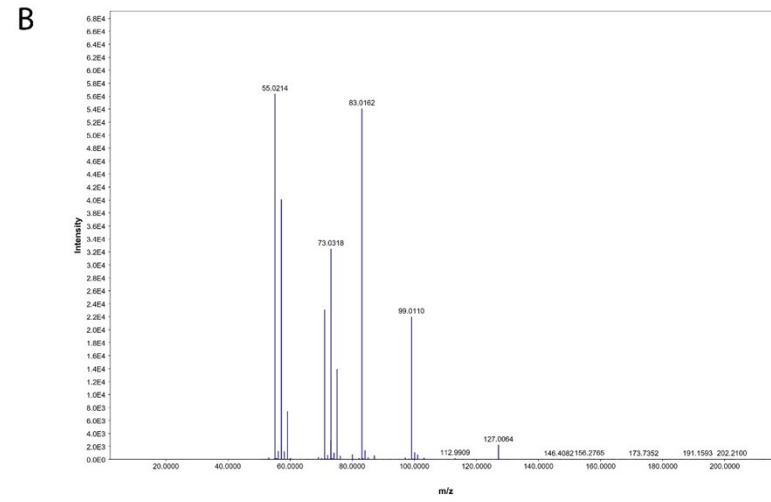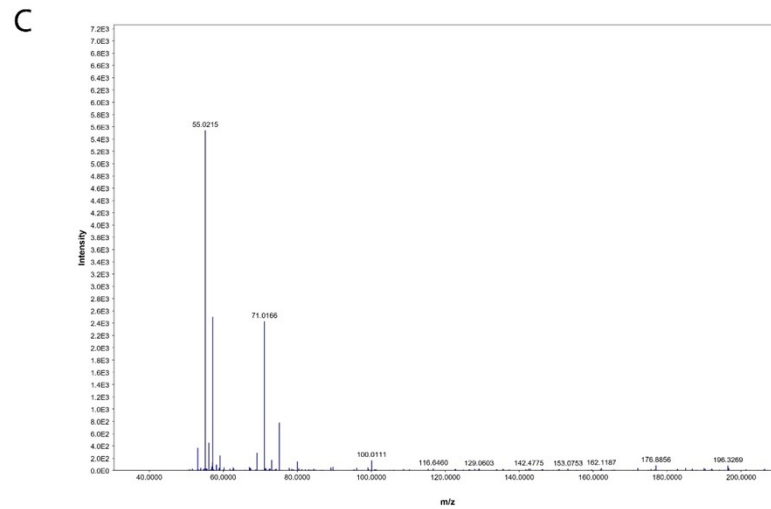

**Figure S1.** Mass fragmentation spectrum of analytical standard Hydroxycitric acid lactone (Hibiscus acid) ( $m/z$ : 189.0078). A: collision energies: 10 eV. B: collision energies: 30 eV. C: collision energies: 60 eV.



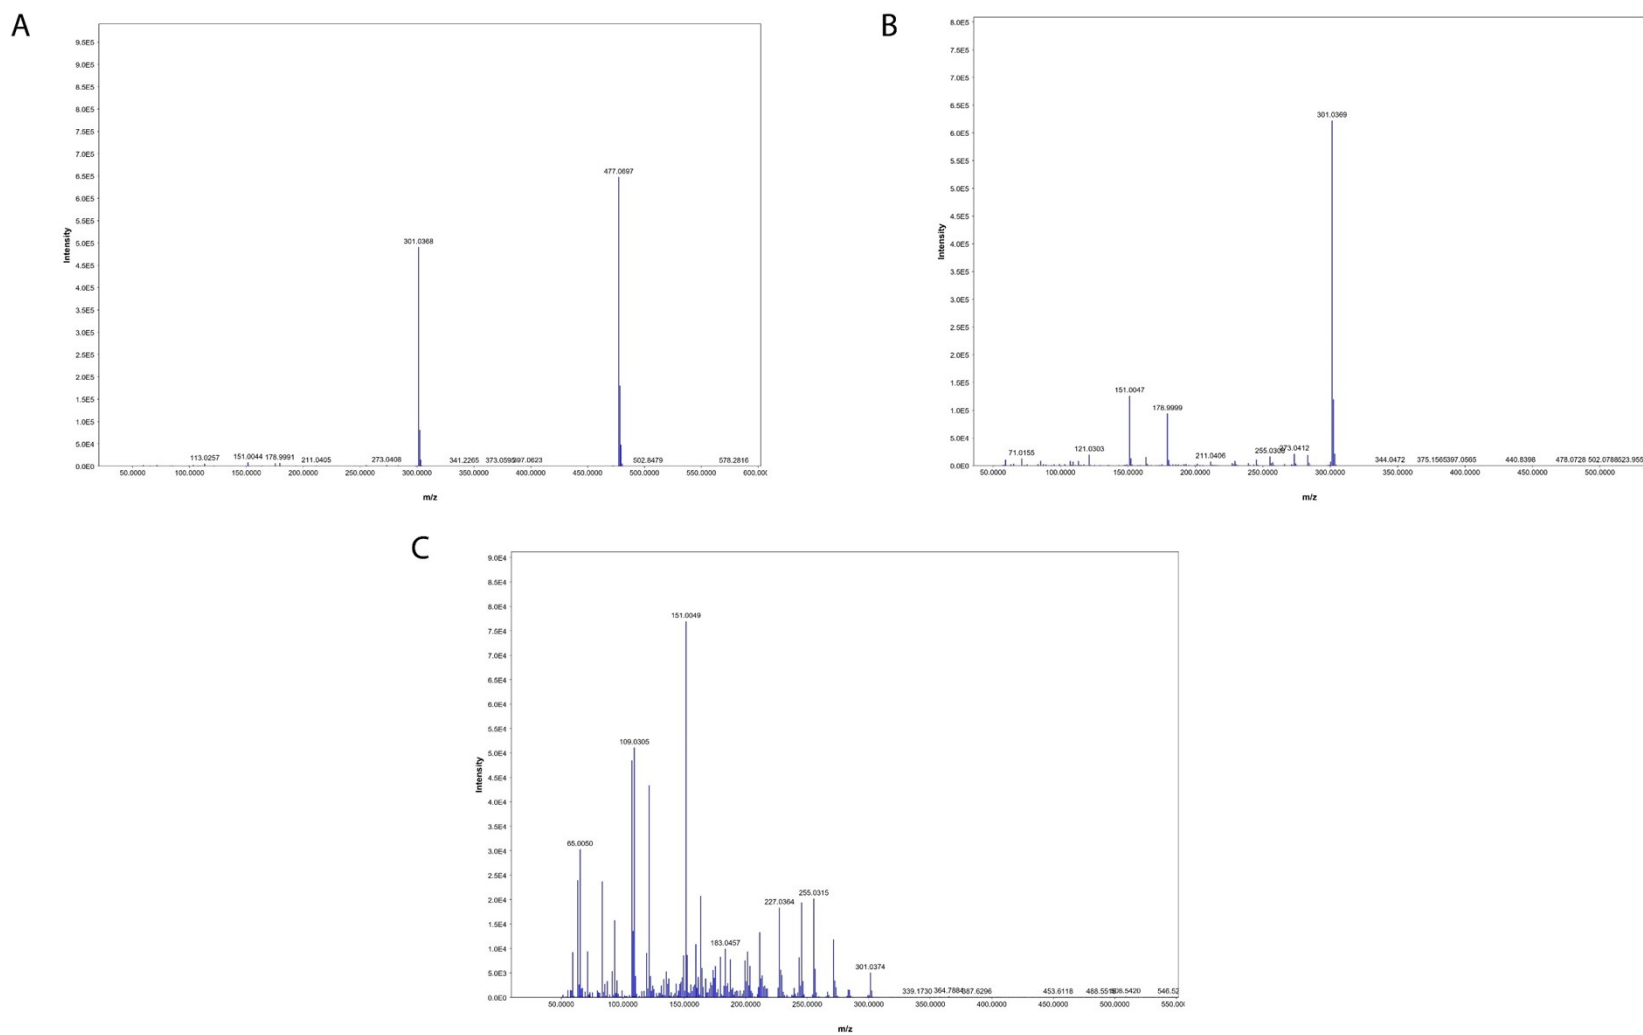

**Figure S2.** Mass fragmentation spectrum of analytical standard Quercetin glucuronide (m/z: 477.0697). A: collision energies: 10 eV. B: collision energies: 30 eV. C: collision energies: 60 eV.

## Quantification of flavan-3-ols and proanthocyanidins by HPLC-ESI-QTOF-MS in *T. cacao* extract

To justify the low number of circulating metabolites detected in plasma samples from the TC extract, the content of catechin and epicatechin in the original extract was quantified, as these compounds have been identified in previous studies as the common bioavailable compounds from the cocoa matrix<sup>24–26</sup>. In addition, the quantification of the two proanthocyanidins identified in the cocoa extract has been included, as these compounds are composed of flavan-3-ol monomers. The quantification was performed using the same HPLC-ESI-QTOF-MS method that had been previously used for the qualitative characterization of the extract<sup>27</sup>. A calibration curve using the commercial analytical standard of catechin (catechin  $\geq 97\%$  from Sigma-Aldrich (Steinheim, Germany)) was used for all compounds. Different standard solution at different concentrations (from 0.39 to 6.25 mg/L) and the TC extract at 1000 mg/L were prepared and analysed by the HPLC-ESI-QTOF-MS. The analytical parameters of the catechin calibration curve are summarised in **Table S5**. Based on the calibration curve and the chromatographic areas for the TC extract, concentrations of 0.18 mg/(g of extract), 1.96 mg/(g of extract), 0.79 mg/(g of extract) and 0.47 mg/(g of extract) were obtained for catechin, epicatechin, procyanidin B1 and procyanidin C, respectively.

**Table S5.** Standard calibration curve used for the quantification of the compounds of interest in TC extract.

| Analytical standard | LOD (mg/L)        | LOQ (mg/L)      | Calibration Range (mg/L) | Calibration Equation | R <sup>2</sup> |
|---------------------|-------------------|-----------------|--------------------------|----------------------|----------------|
| Catechin            | 0.074 $\pm$ 0.004 | 0.25 $\pm$ 0.01 | (LOQ – 6.25)             | y = 29638x - 4779.6  | 0.998          |

LOD: Limit of Detection; LOQ: Limit of Quantification, R<sup>2</sup>: Coefficient of variation.

## References

- 1 Z. Luo, G. Yu, X. Chen, Y. Liu, Y. Zhou, G. Wang and Y. Shi, Integrated phytochemical analysis based on UHPLC-LTQ-Orbitrap and network pharmacology approaches to explore the potential mechanism of: *Lycium ruthenicum* Murr. for ameliorating Alzheimer's disease, *Food Funct*, 2020, **11**, 1362–1372.
- 2 I. C. Rodríguez-Medina, R. Beltrán-Debón, V. M. Molina, C. Alonso-Villaverde, J. Joven, J. A. Menéndez, A. Segura-Carretero and A. Fernández-Gutiérrez, Direct characterization of aqueous extract of *Hibiscus sabdariffa* using HPLC with diode array detection coupled to ESI and ion trap MS, *J Sep Sci*, 2009, **32**, 3441–3448.
- 3 S. Pimentel-Moral, I. Borrás-Linares, J. Lozano-Sánchez, D. Arráez-Román, A. Martínez-Férez and A. Segura-Carretero, Microwave-assisted extraction for *Hibiscus sabdariffa* bioactive compounds, *J Pharm Biomed Anal*, 2018, **156**, 313–322.
- 4 M. S. Hifnawy, M. A. Aboseada, H. M. Hassan, A. M. AboulMagd, A. F. Tohamy, S. H. Abdel-Kawi, M. E. Rateb, E. M. B. El Naggari, M. Liu, R. J. Quinn, H. A. Alhadrami and U. R.

- Abdelmohsen, Testicular Caspase-3 and  $\beta$ -Catenin Regulators Predicted via Comparative Metabolomics and Docking Studies, *Metabolites*, 2020, **10**, 31.
- 5 M. del C. Villegas-Aguilar, F. J. Leyva-Jiménez, M. de la L. Cádiz-Gurrea, A. Segura-Carretero and D. Arráez-Román, Comprehensive Analysis of Antioxidant Compounds from *Lippia citriodora* and *Hibiscus sabdariffa* Green Extracts Attained by Response Surface Methodology, *Antioxidants*, 2020, **9**, 1175.
  - 6 J. T. Pierson, G. R. Monteith, S. J. Roberts-Thomson, R. G. Dietzgen, M. J. Gidley and P. N. Shaw, Phytochemical extraction, characterisation and comparative distribution across four mango (*Mangifera indica* L.) fruit varieties, *Food Chem*, 2014, **149**, 253–263.
  - 7 K. Ferysiuk, K. M. Wójciak and M. Materska, Phytochemical profile of *Silybum marianum* (L.) Gaertn . and *Graminis rhizoma* and its influence on the bioactivity and shelf life of industrially produced pâté, *Int J Food Sci Technol*, 2020, **55**, 1586–1598.
  - 8 L. W. Tian, Y. J. Zhang, Y. F. Wang, C. C. Lai and C. R. Yang, Eucalmaidins A-E, (+)-oleuropeic acid derivatives from the fresh leaves of *Eucalyptus maideni*, *J Nat Prod*, 2009, **72**, 1608–1611.
  - 9 M. Waseem, R. Basra and M. Asim, *Molecular Docking and Computational Exploration of Isolated Drugs from Daphne Species Against COVID-19*, 2021, vol. 40.
  - 10 G. Vidal and C. Ccapatinta, 2018.
  - 11 A. Singh, S. Kumar and B. Kumar, LC-MS Identification of Proanthocyanidins in Bark and Fruit of six Terminalia species, *Nat Prod Commun*, 2018, **13**, 1934578X1801300.
  - 12 J. Vrba, B. Papoušková, L. Roubalová, M. Zatloukalová, D. Biedermann, V. Křen, K. Valentová, J. Ulrichová and J. Vacek, Metabolism of flavonolignans in human hepatocytes, *J Pharm Biomed Anal*, 2018, **152**, 94–101.
  - 13 L. Y. Foo, Phenylpropanoid derivatives of catechin, epicatechin and phylloflavan from *Phyllocladus trichomanoides*, *Phytochemistry*, 1987, **26**, 2825–2830.
  - 14 J. Hu, X. Li, W. Tian, Y. Lu, Y. Xu, F. Wang, W. Qin, X. Ma, P.-T. Puno and W. Xiong, Adenanthin, a Natural ent-Kaurane Diterpenoid Isolated from the Herb *Isodon adenantha* Inhibits Adipogenesis and the Development of Obesity by Regulation of ROS, *Molecules*, 2019, **24**, 158.
  - 15 R. Hendriani and E. Yulinah Sukandar, *Vitro Evaluation of Xanthine Oxidase Inhibitory Activity of Selected Medicinal Plants*, 2016, vol. 8.
  - 16 H. Q. Wang, F. Lan, Y. H. Zhang, J. E. Xia, X. M. Gong and M. Liu, Identification and pharmacokinetics of saponins in *Rhizoma Anemarrhenae* after oral administration to rats by HPLC-Q-TOF/MS and HPLC-MS/MS, *Acta Pharmaceutica*, 2021, **71**, 567–585.
  - 17 M. L. Cádiz-Gurrea, J. Lozano-Sanchez, M. Contreras-Gámez, L. Legeai-Mallet, S. Fernández-Arroyo and A. Segura-Carretero, Isolation, comprehensive characterization and antioxidant activities of *Theobroma cacao* extract, *J Funct Foods*, 2014, **10**, 485–498.
  - 18 M. de la L. Cádiz-Gurrea, Á. Fernández-Ochoa, F. J. Leyva-Jiménez, N. Guerrero-Muñoz, M. del C. Villegas-Aguilar, S. Pimentel-Moral, F. Ramos-Escudero and A. Segura-Carretero,

- LC-MS and Spectrophotometric Approaches for Evaluation of Bioactive Compounds from Peru Cocoa By-Products for Commercial Applications, *Molecules*, 2020, **25**, 3177.
- 19 M. Greño, M. Herrero, A. Cifuentes, M. L. Marina and M. Castro-Puyana, Assessment of cocoa powder changes during the alkalization process using untargeted metabolomics, *LWT*, 2022, **172**, 114207.
  - 20 K. K. N. Bini, K. C. Kobenan, M. Kouakou, I. S. Kouadio, G. Zengin, J. Jekó, Z. Cziáky, M. Danho and O. G. Ochou, Phytochemical profiling, antioxidant activities, enzymatic activities and insecticidal potential of aqueous extracts of four plants on the larvae of *Helicoverpa armigera* (Lepidoptera: Noctuidae), the main pest of cotton plant in Ivory Coast, *Arch Insect Biochem Physiol*, , DOI:10.1002/arch.22017.
  - 21 A. Lorente, D. Pla, L. M. Cañedo, F. Albericio and M. Álvarez, Isolation, structural assignment, and total synthesis of barmumycin, *Journal of Organic Chemistry*, 2010, **75**, 8508–8515.
  - 22 J. Jiang, Y. Liu, K. Min, B. Jing, L. Wang, Y. Zhang and Y. Chen, Two New Lycopodine Alkaloids from *Huperzia serrata*, *Helv Chim Acta*, 2010, **93**, 1187–1191.
  - 23 M. Schwarz, F. Weber, E. Durán-Guerrero, R. Castro, M. D. C. Rodríguez-Dodero, M. V. García-Moreno, P. Winterhalter and D. Guillén-Sánchez, HPLC-DAD-MS and Antioxidant Profile of Fractions from Amontillado Sherry Wine Obtained Using High-Speed Counter-Current Chromatography, *Foods*, 2021, **10**, 131.
  - 24 L. M. Ostertag, P. A. Kroon, S. Wood, G. W. Horgan, E. Cienfuegos-Jovellanos, S. Saha, G. G. Duthie and B. de Roos, Flavan-3-ol-enriched dark chocolate and white chocolate improve acute measures of platelet function in a gender-specific way—a randomized-controlled human intervention trial, *Mol Nutr Food Res*, 2013, **57**, 191–202.
  - 25 F. A. Tomas-Barberán, E. Cienfuegos-Jovellanos, A. Marín, B. Muguerza, A. Gil-Izquierdo, B. Cerdá, P. Zafrilla, J. Morillas, J. Mulero, A. Ibarra, M. A. Pasamar, D. Ramón and J. C. Espín, A New Process To Develop a Cocoa Powder with Higher Flavonoid Monomer Content and Enhanced Bioavailability in Healthy Humans, *J Agric Food Chem*, 2007, **55**, 3926–3935.
  - 26 M. Gómez-Juaristi, B. Sarria, S. Martínez-López, L. Bravo Clemente and R. Mateos, Flavanol Bioavailability in Two Cocoa Products with Different Phenolic Content. A Comparative Study in Humans, *Nutrients*, 2019, **11**, 1441.
  - 27 M. del C. Villegas-Aguilar, N. Sánchez-Marzo, Á. Fernández-Ochoa, C. Del Río, J. Montaner, V. Micol, M. Herranz-López, E. Barrajon-Catalán, D. Arráez-Román, M. de la L. Cádiz-Gurrea and A. Segura-Carretero, Evaluation of Bioactive Effects of Five Plant Extracts with Different Phenolic Compositions against Different Therapeutic Targets, *Antioxidants*, 2024, **13**, 217.
